# Supplementary material for: EMT-induced cell mechanical changes enhance mitotic rounding strength
Source: bioRxiv or medRxiv preprint supplement (doi:10.1101/598052), 2020-05-19
Supplement: Supplementary file [file media-1.pdf]

## **Supplementary Information**

### **EMT-induced cell mechanical changes enhance mitotic rounding strength**

Kamran Hosseini<sup>1</sup>, Anna Taubenberger<sup>1</sup>, Carsten Werner<sup>2</sup>, Elisabeth Fischer-Friedrich<sup>1,\*</sup>

<sup>1</sup> Biotechnology Center, Technische Universität Dresden, Tatzberg 47-49, 01307 Dresden, Germany

<sup>2</sup> Leibniz Institute of Polymer Research Dresden, Max Bergmann Center, Hohe Str. 6, 01069 Dresden, Germany

\* Corresponding author

Correspondence to: Elisabeth Fischer-Friedrich, Biotechnology Center, Technische Universität Dresden, Mailto: [elisabeth.fischer-friedrich@tu-dresden.de](mailto:elisabeth.fischer-friedrich@tu-dresden.de). Phone: ++49 351 463 40235. Fax: ++49 351 463 40342.

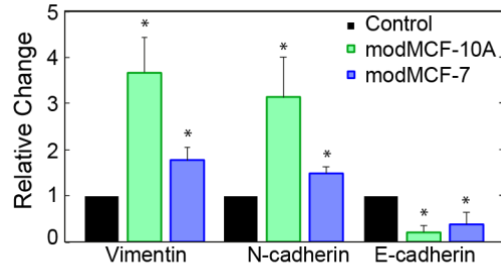

Figure S2: Relative change of protein levels of epithelial marker E-cadherin and mesenchymal markers N-cadherin and Vimentin in breast epithelial cells before and after EMT from Western blot assays (Fig.2, Main Text). (E-Cadherin  $n=3$ , N-Cadherin  $n=3$  and Vimentin  $n=4$ , all independent samples). Post-EMT cells are referred to as modMCF-7 and mod-MCF-10A, respectively. Error bars indicate standard error of the mean.  $^{ns}p > 0.05$ ,  $^*p < 0.05$ ,  $^{**}p < 0.01$ ,  $^{***}p < 0.001$ ).

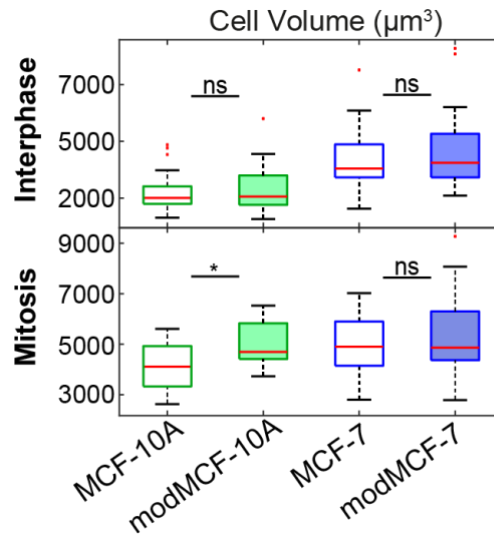

Figure S3: **a,b**, Cell volumes of MCF-7 and MCF-10A cells before and after EMT corresponding to measurements presented in Fig. 3, main for suspended interphase cells (**a**) and cells in mitotic arrest (**b**) before and after EMT. (Post-EMT cells are referred to as modMCF-7 and mod-MCF-10A, respectively. Number of cells measured: Interphase: MCF-7  $n=27$ , modMCF-7  $n=28$ , MCF-10A  $n=27$ . Mitosis: MCF-7  $n=34$ , modMCF-7  $n=45$ , MCF-10A  $n=12$ , modMCF-10A  $n=12$ .  $^{ns}p > 0.05$ ,  $^*p < 0.05$ ,  $^{**}p < 0.01$ ,  $^{***}p < 0.001$ ).

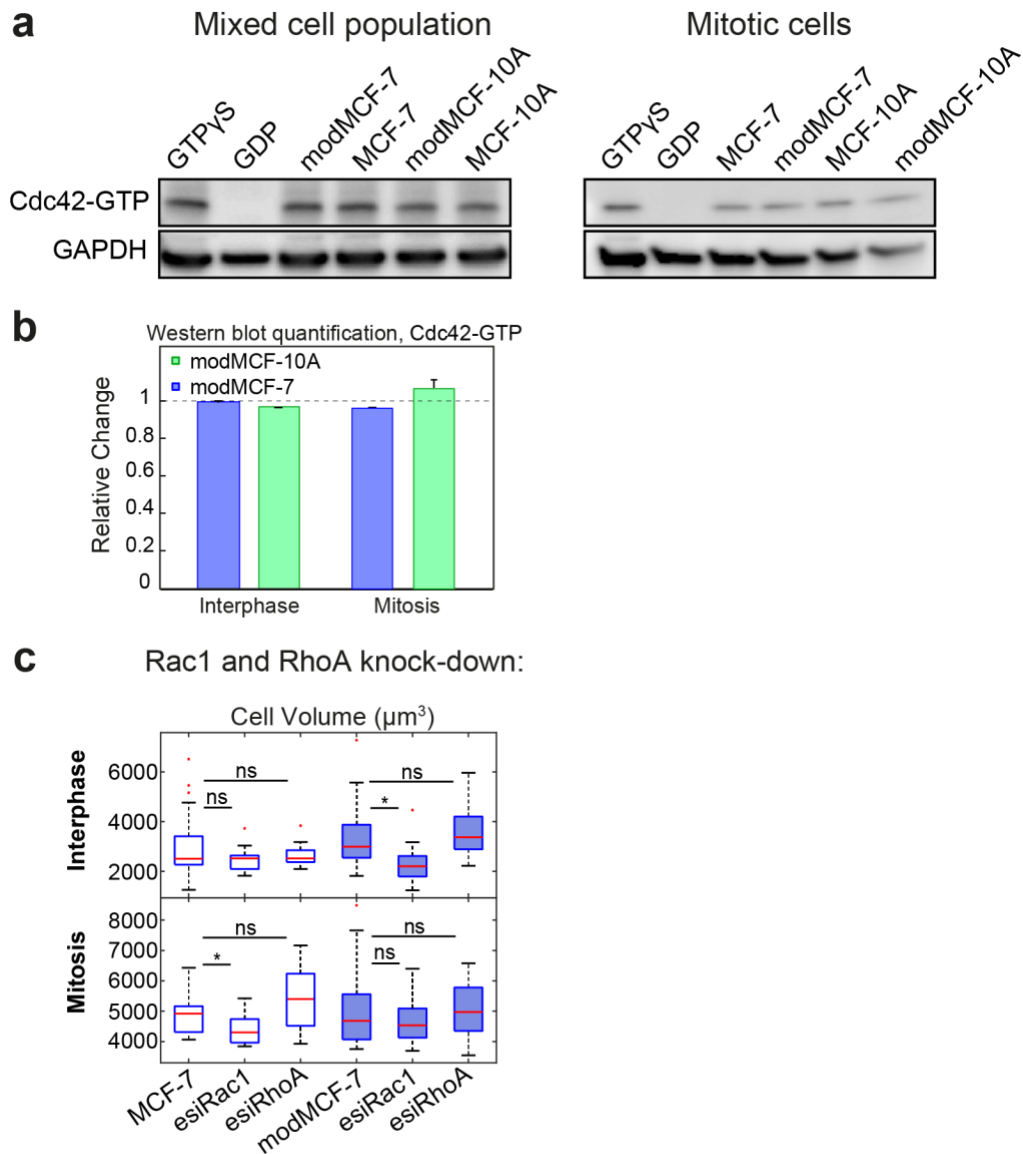

*Figure S4: a-c, Relative changes of active Cdc42 upon EMT. GTP-bound Cdc42 was pulled down using beads from cell lysates in pre and post-EMT conditions. a, Western blots showing active Cdc42 from cell lysates before and after EMT. b, Quantification of GTP-Cdc42 for n=2 (independent samples). (Error bars indicate standard error of the mean. Post-EMT cells are referred to as modMCF-7 and mod-MCF-10A, respectively). c, Cell volumes in control conditions and after knock-down of Rac1 or RhoA corresponding to measurements presented in Fig. 4c-h, main text. (Post-EMT cells are referred to as modMCF-7 and mod-MCF-10A, respectively. Number of cells measured: Interphase: MCF-7 n=24, esiRac1 n=24, esiRhoA n=17, modMCF-7 n=26, esiRac1 n=10 and esiRhoA n=13. Mitosis: MCF-7 n=11, esiRac1 n=12, esiRhoA n=13, modMCF-7 n=14, esiRac1 n=14 and esiRhoA n=14. <sup>ns</sup>p > 0.05, \*p < 0.05, \*\*p < 0.01, \*\*\*p < 0.001).*

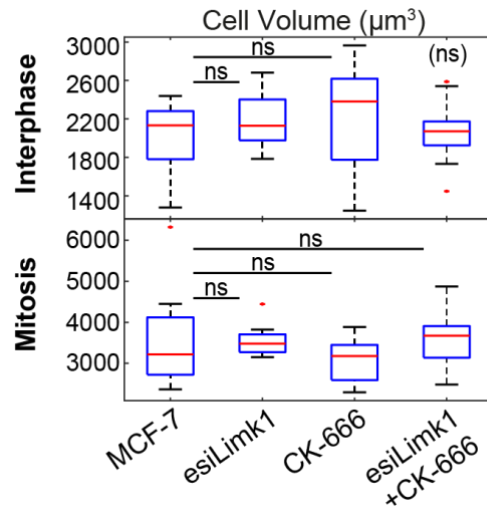

Figure S5: Corresponding cell volumes for measurements presented in Fig. 5a-c, main text. Four different condition were sampled: i) control MCF-7, ii) *Limk1* knock-down, iii) Arp2/3 inhibition by the cytoskeletal drug CK666 (50 µM) and iv) combined *Limk1* knock-down and Arp2/3 inhibition through CK666 (50 µM). Top row: suspended interphase MCF-7, Bottom row: MCF-7 in mitotic arrest. (Number of cells measured: Interphase: MCF-7 n=11, esiLIMK1 n=12, CK-666 n=12 and esiLIMK1 + CK-666 n=12. Mitosis: MCF-7 n=13, esiLIMK1 n=12, CK-666 n=11 and esiLIMK1 + CK-666 n=13). ( <sup>ns</sup>p > 0.05, \*p < 0.05, \*\*p < 0.01, \*\*\*p < 0.001)
